# Supplementary material for: Ultralow thermal conductivity in the mixed-anion solid solution Sn2SbS2−xSexI3
Source: Royal Society of Chemistry journal article supplement (doi:10.1039/d3ta00609c), 2023-01-01
Supplement: d3ta00609c1.pdf [file d3ta00609c1.pdf]

## Ultralow thermal conductivity in the mixed-anion solid solution $\text{Sn}_2\text{SbS}_{2-x}\text{Se}_x\text{I}_3$

Justin Mark,<sup>a,#</sup> Wenhao Zhang,<sup>a,b,#</sup> Kazuhiko Maeda,<sup>c</sup> Takafumi Yamamoto,<sup>d</sup> Hiroshi Kageyama<sup>e</sup>  
and Takao Mori<sup>a,b,\*</sup>

<sup>a</sup> *International Center for Materials Nanoarchitectonics (WPI-MANA), National Institute for Materials Science (NIMS), Tsukuba, Ibaraki 305-0044, Japan*

<sup>b</sup> *Graduate School of Pure and Applied Science, University of Tsukuba, Tsukuba, Ibaraki 305-8671, Japan*

<sup>c</sup> *Department of Chemistry, School of Science, Tokyo Institute of Technology, Tokyo, Japan*

<sup>d</sup> *Laboratory for Materials and Structures, Tokyo Institute of Technology, Yokohama, Japan*

<sup>e</sup> *Graduate School of Engineering, Kyoto University, Kyoto, Japan*

# J.M. and W.Z. contributed equally to this work

\* Corresponding author, e-mail: MORI.takao@nims.go.jp

# Supporting Information

## PPMS Correction for additional radiation loss

### Correcting radiation loss with larger emissivity

PPMS TTO measures the thermal conductivity by measuring sample thermal conductance. The sample thermal conductance is given by:

$$K = (I^2R - P_{rad}/\Delta T) - K_{shoe}$$

where  $I^2R$  is the heater power provided at one end of the sample.  $P_{rad}$  is the power lost through radiation.  $\Delta T$  is the temperature difference and  $K_{shoe}$  is the thermal conductance of the shoe.

Radiation loss is estimated by:

$$P_{rad} = \frac{S}{2} \sigma_T \epsilon (T_{hot}^4 - T_{cold}^4)$$

The  $T^4$  terms give the strong dependence of radiation loss with temperature,  $S$  is the sample's surface area,  $\sigma_T$  is the Stefan-Boltzmann constant and  $\epsilon$  is the infrared emissivity.

According to the TTO manual, for metallic surfaces,  $\epsilon \approx 0.3$  and for nonmetallic surfaces,  $\epsilon \approx 1.0$ . During our measurement, we used an  $\epsilon = 0.5$  as measurement parameter. But for our sample, it is more appropriate to use the values near  $\epsilon \approx 1.0$ .

We therefore apply additional correction after the measurement by increasing the sample emissivity. In the raw datafile of PPMS TTO,  $I^2R$ ,  $\Delta T$  and  $P_{rad}$  are all recorded. Since  $P_{rad}$  is linear in  $\epsilon$ , we multiply  $P_{rad}$  by 2.0, corresponding to  $\epsilon = 1.0$  and then recalculate the thermal conductance and finally, the thermal conductivity is given by:

$$\kappa = Kl/A$$

where  $A$  is the cross-section area of the sample and  $l$  is the length between the temperature measurement.

### Analysis of error in the thermal conductivity measurement

The error in the laser flash measurement comes from the error in determining  $C_p$  and the error in estimating the thermal diffusivity, the combined error is under 10%, according to the instrument manual.

The error in PPMS TTO measurement is much larger. In our measurement, the error in the measurement at 300 K is about  $\pm 0.12$  W/mK. Furthermore, the error in the estimation of radiation loss can be up to 1mW/K (thermal conductance), as described in the manual. With our non-optimal sample geometry ( $L \approx 3.3mm$  and  $A \approx 4.6mm^2$  with  $L$  and  $A$  is the distance between two contact and the cross-section area), this translates to an error in thermal conductivity as large as 0.72 W/mK. In conclusion, large systematic error in thermal conductivity measured above 150 K can be expected. However, our main observation that a board peak in thermal conductivity at low temperature is present is not affected by the errors at higher temperature.

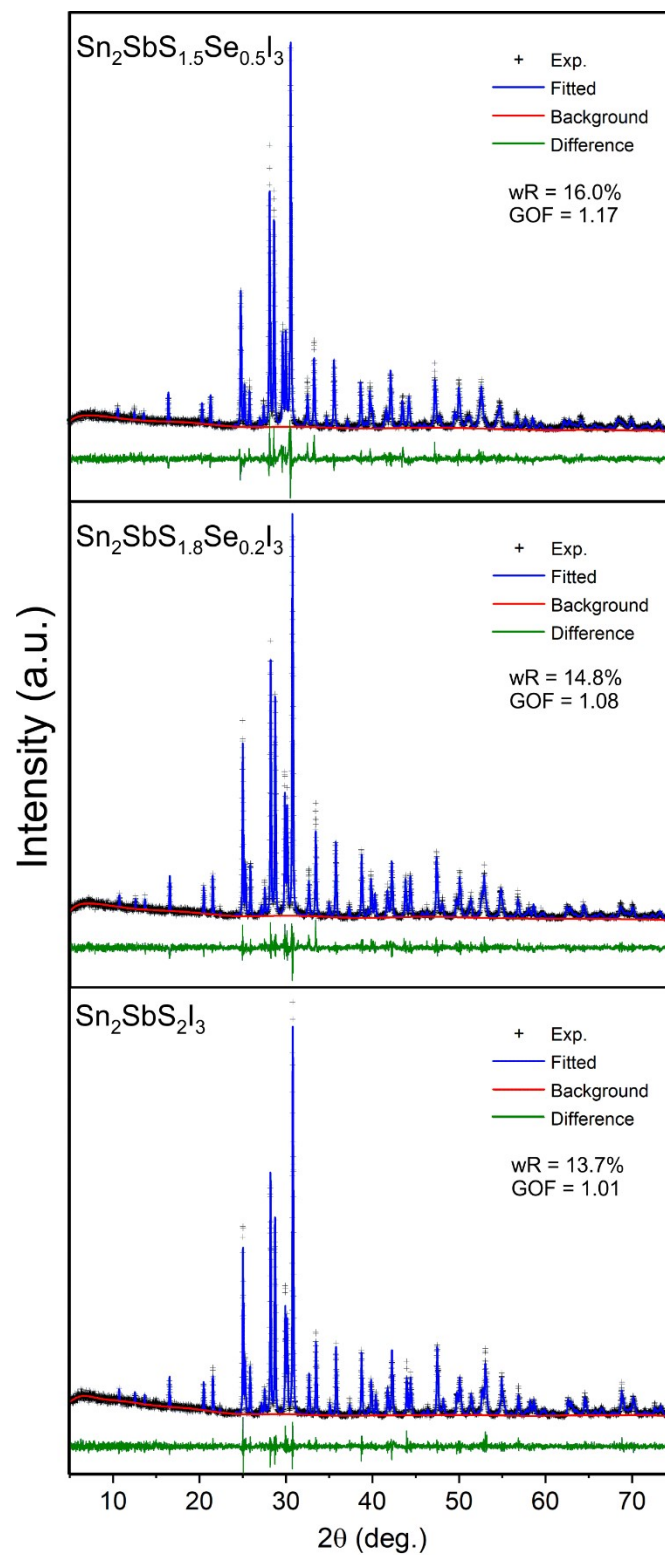

**Figure S1.** Rietveld refinement for  $\text{Sn}_2\text{SbS}_{2-x}\text{Se}_x\text{I}_3$  ( $x = 0, 0.2, 0.5$ ) samples fit to the reported  $\text{Sn}_2\text{SbS}_2\text{I}_3$  structure.<sup>1</sup>

**Table S1.** Lattice parameters of  $\text{Sn}_2\text{SbS}_{2-x}\text{Se}_x\text{I}_3$  determined through Rietveld refinement compared to reported single crystal unit cells of  $\text{Sn}_2\text{SbS}_2\text{I}_3$  and  $\text{Sn}_2\text{SbSe}_2\text{I}_3$ .<sup>1</sup>

|         | <sup>1</sup> Reported<br>$\text{Sn}_2\text{SbS}_2\text{I}_3$ | $\text{Sn}_2\text{SbS}_2\text{I}_3$ | $\text{Sn}_2\text{SbS}_{1.8}\text{Se}_{0.2}\text{I}_3$ | $\text{Sn}_2\text{SbS}_{1.5}\text{Se}_{0.5}\text{I}_3$ | <sup>1</sup> Reported<br>$\text{Sn}_2\text{SbSe}_2\text{I}_3$ |
|---------|--------------------------------------------------------------|-------------------------------------|--------------------------------------------------------|--------------------------------------------------------|---------------------------------------------------------------|
| $a$ (Å) | 4.275(1)                                                     | 4.272(1)                            | 4.278(2)                                               | 4.284(1)                                               | 4.298(3)                                                      |
| $b$ (Å) | 14.059(3)                                                    | 14.067(4)                           | 14.077(4)                                              | 14.084(3)                                              | 14.085(5)                                                     |
| $c$ (Å) | 16.465(3)                                                    | 16.456(4)                           | 16.519(6)                                              | 16.627(4)                                              | 17.222(8)                                                     |

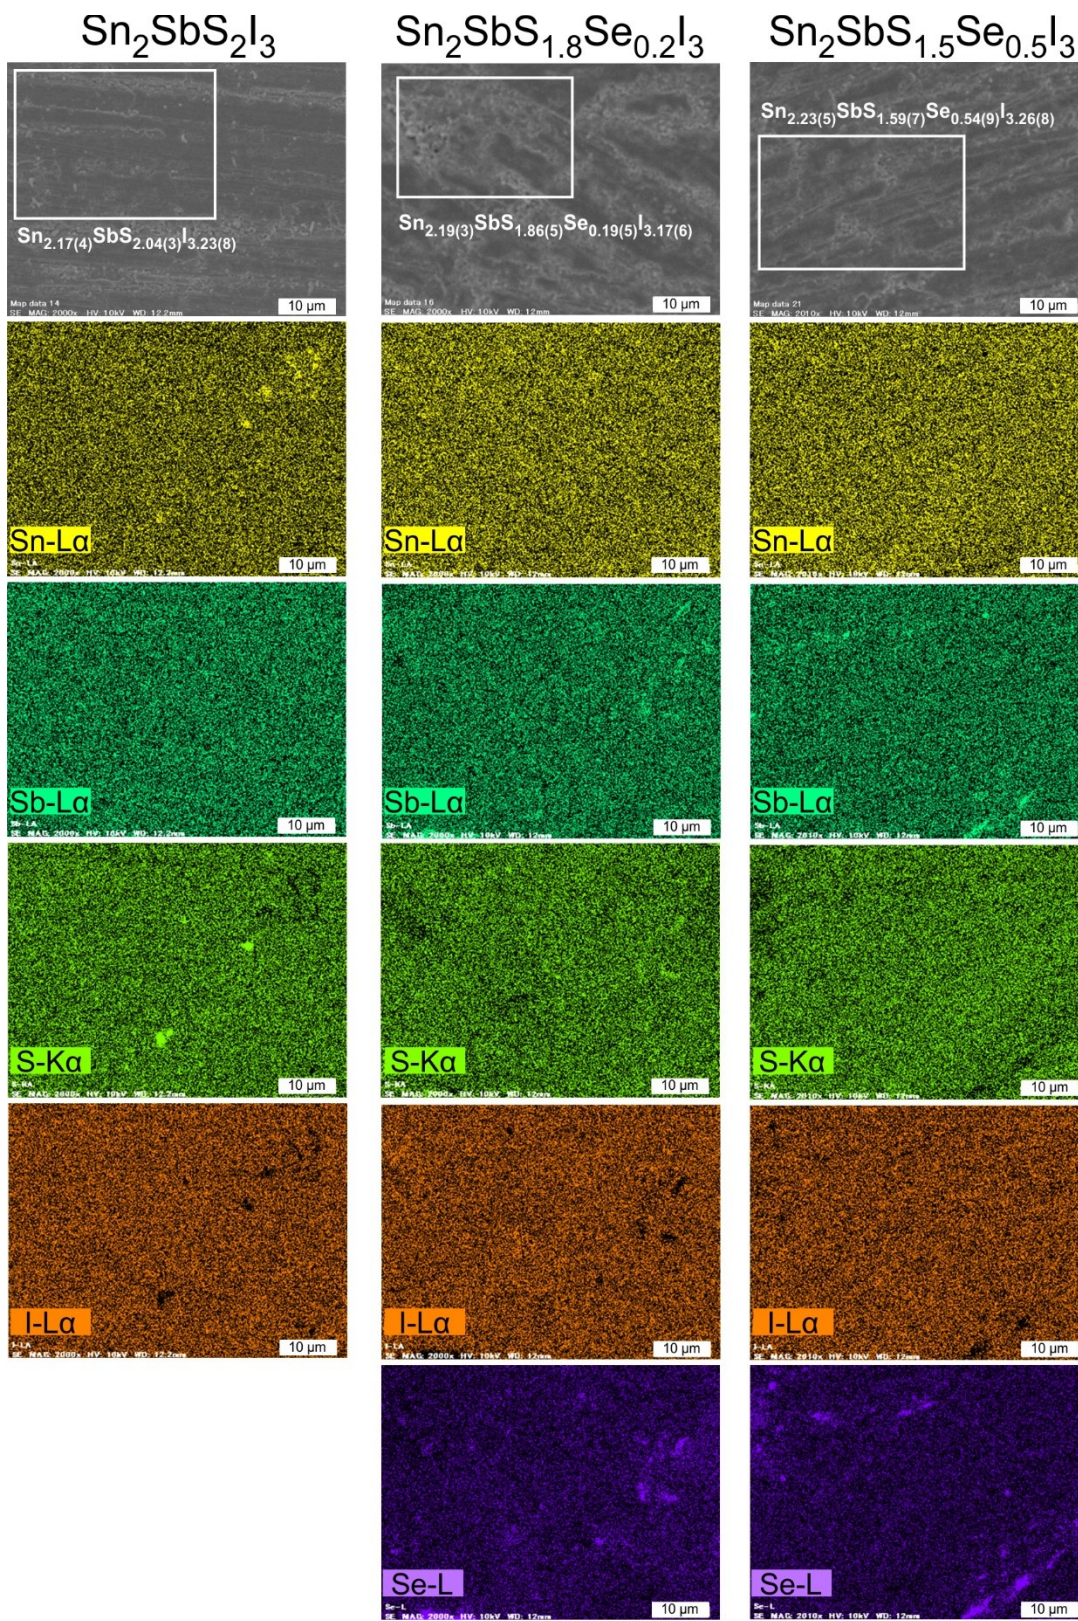

**Figure S2.** SEM-EDS images of  $\text{Sn}_2\text{SbS}_{2-x}\text{Se}_x\text{I}_3$  ( $x = 0, 0.2, 0.5$ ). Areas used for bulk composition determination are highlighted by white boxes and labeled with the respective determined compositions.

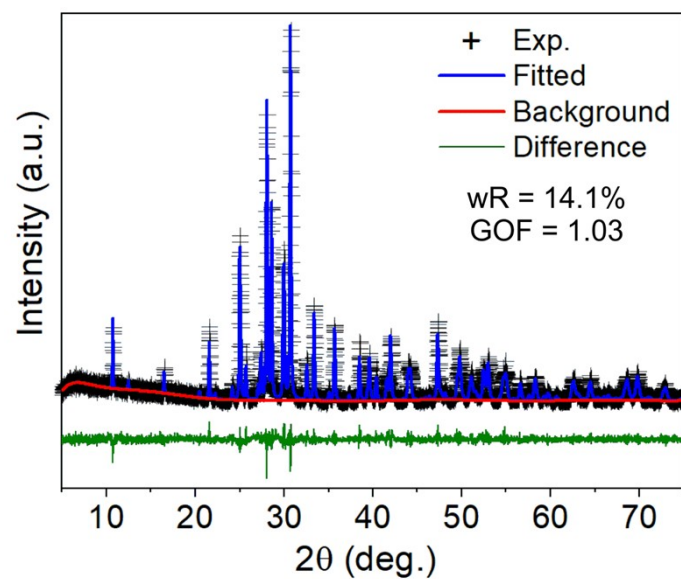

**Figure S3.** Rietveld refinement for synthesized  $\text{Sn}_2\text{BiS}_2\text{I}_3$  sample fit to the reported  $\text{Sn}_2\text{BiS}_2\text{I}_3$  structure.<sup>2</sup>

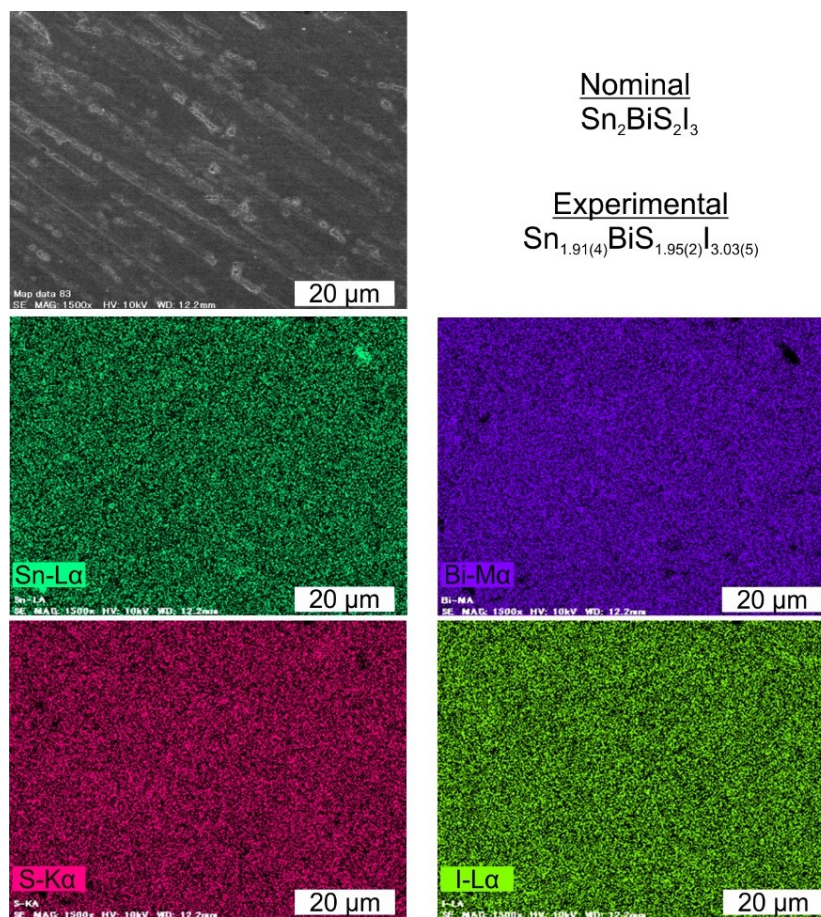

**Figure S4.** SEM-EDS images of  $\text{Sn}_2\text{BiS}_2\text{I}_3$ . Experimental composition is normalized to 1 Bi and is an average of three measured spots.

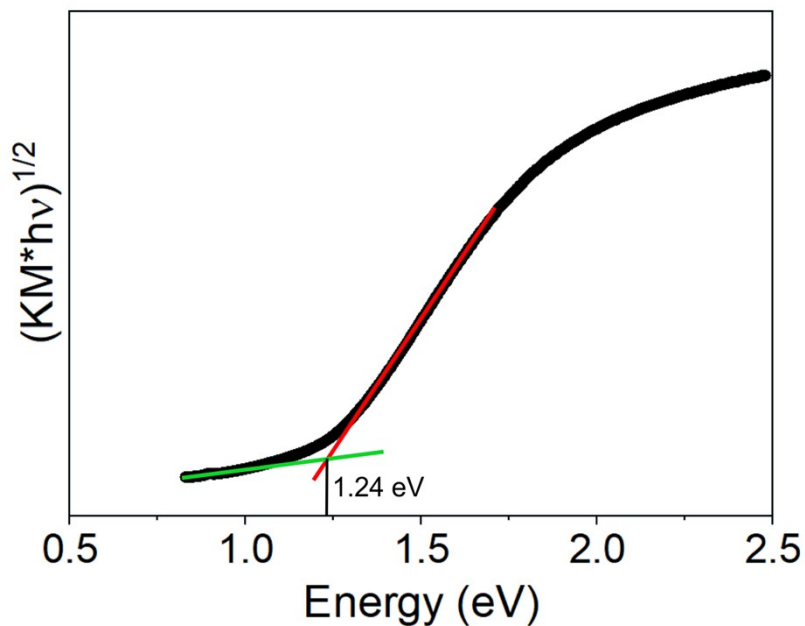

**Figure S5.** Indirect bandgap Tauc plot of solid state UV-Vis Kubelka-Munk diffuse reflectance spectra for  $\text{Sn}_2\text{BiS}_2\text{I}_3$ .

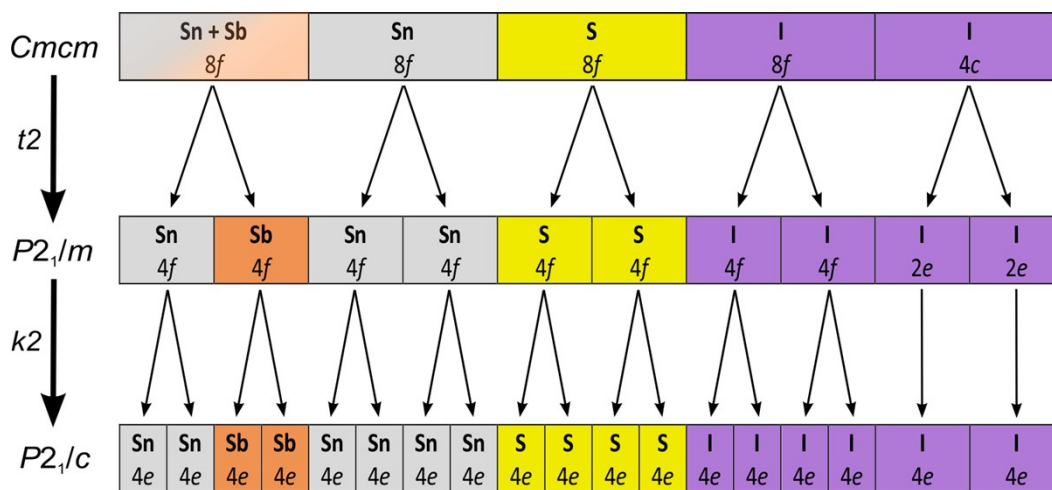

**Figure S6.** Group-subgroup relationship of  $\text{Sn}_2\text{SbS}_2\text{I}_3$   $Cmcm$  and  $P2_1/c$  structures illustrating the splitting of the Wyckoff positions.

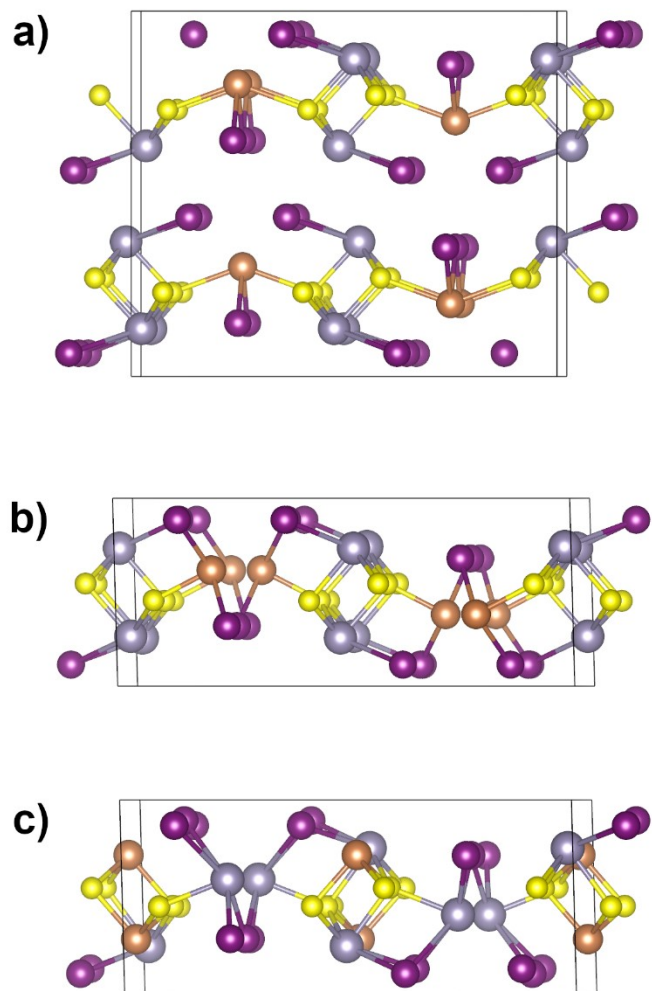

**Figure S7.**  $\text{Sn}_2\text{SbS}_2\text{I}_3$  structures a)  $Cmc-4c$ , b)  $P2_1/c$   $-(Cmc)$  and c)  $LT-P2_1/c$  considered for computational analysis. The colors correspond to the colors used in the article: gray: Sn, orange: Sb, yellow: S and purple: I. Notice how the Sb atom displace away from  $Cmc-4c$  to  $P2_1/c$   $-(Cmc)$ , and the Sn and Sb atom change position in  $LT-P2_1/c$ .



**Table S2.** The lattice parameter of the DFT relaxed structure models, corresponding to  $Cmcm$ -4c,  $P2_1/c$  - ( $Cmcm$ ) and LT- $P2_1/c$  structures

|          | $Cmcm$ -4c             | $P2_1/c$ - $Cmcm$      | LT- $P2_1/c$           |
|----------|------------------------|------------------------|------------------------|
| $a$      | 4.275                  | 7.441                  | 7.472                  |
| $b$      | 14.059                 | 17.350                 | 16.744                 |
| $c$      | 16.365                 | 8.627                  | 8.616                  |
| $\alpha$ | 90                     | 90                     | 90                     |
| $\beta$  | 90                     | 107.418                | 106.65                 |
| $\gamma$ | 90                     | 90                     | 90                     |
| Sn       | 4a (0.000,0.147,0.529) | 4e (0.257,0.477,0.292) | 4e (0.590,0.227,0.157) |
| Sn       | 4a (0.000,0.109,0.984) | 4e (0.266,0.017,0.336) | 4e (0.248,0.480,0.307) |
| Sb       | 4a (0.000,0.214,0.277) | 4e (0.617,0.206,0.135) | 4e (0.283,0.014,0.325) |
| S        | 4a (0.000,0.286,0.416) | 4e (0.454,0.419,0.116) | 4e (0.454,0.415,0.098) |
| S        | 4a (0.000,0.253,0.084) | 4e (0.457,0.079,0.109) | 4e (0.451,0.076,0.126) |
| I        | 4a (0.000,0.575,0.355) | 4e (0.115,0.624,0.028) | 4e (0.106,0.621,0.031) |
| I        | 4a (0.000,0.541,0.117) | 4e (0.320,0.250,0.332) | 4e (0.285,0.256,0.326) |
| I        | 4a (0.000,0.137,0.743) | 4e (0.115,0.640,0.524) | 4e (0.131,0.621,0.531) |

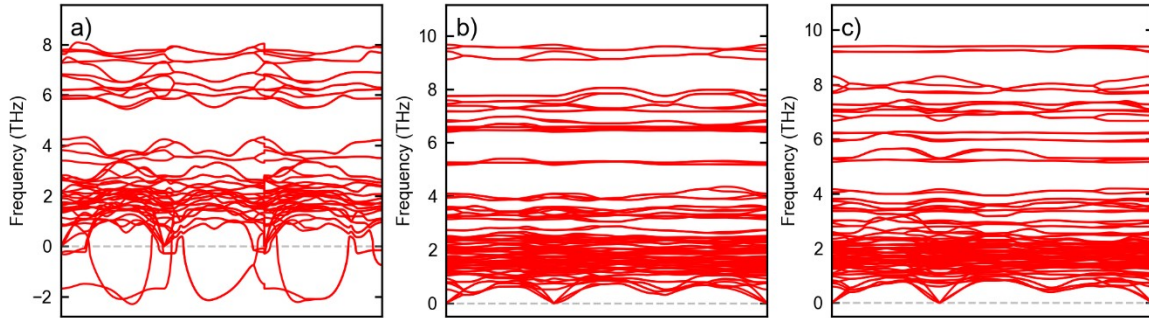

**Figure S8.** Calculated phonon dispersion of a)  $Cmcm$ -4c, b)  $P2_1/c$  - ( $Cmcm$ ) and c) LT- $P2_1/c$  structures of  $Sn_2SbS_2I_3$ .

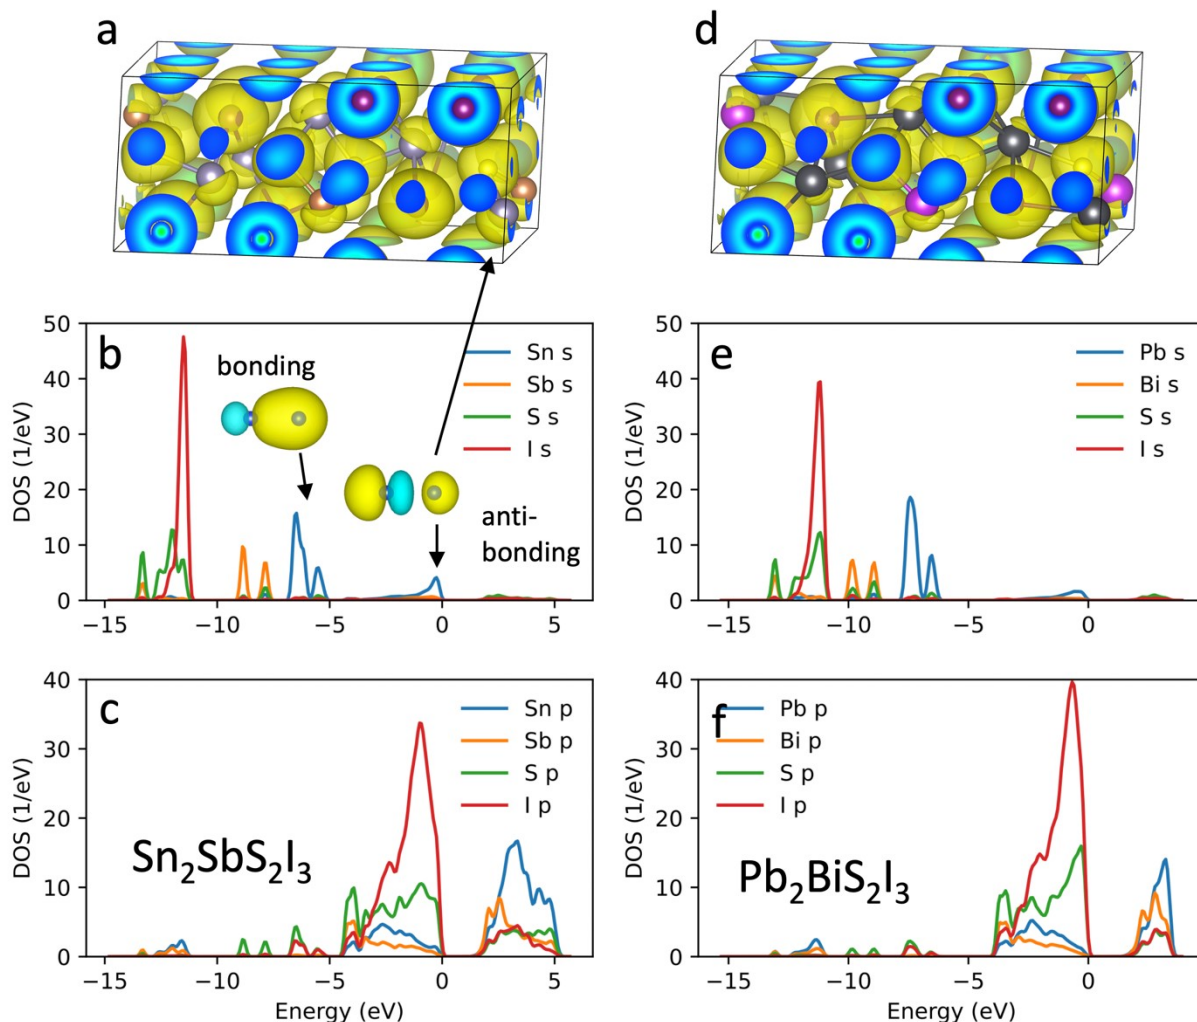

**Figure S9.** Confirmation of the assignment of electron localized region to the s orbitals of Pb and Sb near the top of the valence band. a) the integrated local density of states for  $\text{Sn}_2\text{SbS}_2\text{I}_3$ . b) the projected density of states of  $\text{Sn}_2\text{SbS}_2\text{I}_3$  showing the s orbital component of Sn. The inset shows a simplified picture of bonding states related to Sn s orbital. c) the projected density of states of  $\text{Sn}_2\text{SbS}_2\text{I}_3$  for the p orbitals. d)–f), the same figures but for  $\text{Pb}_2\text{BiS}_2\text{I}_3$ , which does not show a strong anti-bonding s state from Pb near the valence band maximum corresponding density in the anti-bonding region in real space. Note that this 'crescent moon' shaped electron density overlaps with the same shape in ELF plot (Figure 6)

## References

1. Ibanez, A.; Jumas, J.-C.; Olivier-Fourcade, J.; Philippot, E., Mise en évidence d'un desordre statistique dans les structures chalcogenoiodures d'étain et d'antimoine. *J. Solid State Chem.* **1984**, *55*, 83-91.
2. Islam, S. M.; Malliakas, C. D.; Sarma, D.; Maloney, D. C.; Stoumpos, C. C.; Kontsevoi, O. Y.; Freeman, A. J.; Kanatzidis, M. G., Direct Gap Semiconductors  $\text{Pb}_2\text{BiS}_2\text{I}_3$ ,  $\text{Sn}_2\text{BiS}_2\text{I}_3$ , and  $\text{Sn}_2\text{BiS}_2\text{I}_5$ . *Chem. Mater.* **2016**, *28*, 7332-7343.
